# Supplementary material
Source: publisher figshare collection journal article supplement (https://sage.figshare.com/ndownloader/files/20225280)
Supplement: Supplementary file 1 [file 20225280]

|                   | Description                                                                                                                                                                                                                                                                                                                                                                      | Reference/Link                                                                                                                                                                                                                                                                                                                                                                                                                                                 |
|-------------------|----------------------------------------------------------------------------------------------------------------------------------------------------------------------------------------------------------------------------------------------------------------------------------------------------------------------------------------------------------------------------------|----------------------------------------------------------------------------------------------------------------------------------------------------------------------------------------------------------------------------------------------------------------------------------------------------------------------------------------------------------------------------------------------------------------------------------------------------------------|
| <b>Glo-yo</b>     | The Glo-yo is an interactive toy that helps children learn how to wash their hands better. The toy was designed by an undergraduate engineering student, with the help of school children. The device has a UV light and LDS screen which presents the optimal handwashing regime, timed over 20 seconds as the WHO recommendation for HHC.                                      | <a href="http://glo-yo.co.uk/">http://glo-yo.co.uk/</a> , Randle et al. 2013                                                                                                                                                                                                                                                                                                                                                                                   |
| <b>MLT</b>        | A video is aimed towards patients, visitors and HCWs, and presents the importance of hand hygiene, and the appropriate steps that can reduce the spread of HCAI between patients, visitors and HCWs. The video covers the following: Preventing the spread of germs, when you should clean your hands and hand washing techniques. It was shown to the people on a mobile phone. | The video was produced for the use in hospital and healthcare centres in Nottingham University NHS Trust. Content authors Jacqueline Randle, Heather Wharrad and Richard Windle of the University of Nottingham and Natalie Vaughn of the NHS. Technical development was by Peter Cook (video) and Fred (Web). <a href="http://www.nottingham.ac.uk/nmp/sonet/rlos/placs/cleanyourhands/">http://www.nottingham.ac.uk/nmp/sonet/rlos/placs/cleanyourhands/</a> |
| <b>HH Leaflet</b> | A patient care leaflet that presents the important steps of HH to prevent and control infection.                                                                                                                                                                                                                                                                                 | Supplementary Figure B                                                                                                                                                                                                                                                                                                                                                                                                                                         |

Supplementary Table A. Description of the Glo-yo, Mobile learning technology (MLT) and leaflet used for this study. Abbreviations; Ultraviolet: UV, Liquid-crystal display screen: LDS, HHC: Hand hygiene compliance, HCW: Healthcare worker, HCAI: Healthcare associated infection, HH: Hand hygiene, NHS: National Health Service.
